# Supplementary material for: Contribution of the medial eye field network to the voluntary deployment of visuospatial attention
Source: PubMed Central journal article supplement (PMC8763913; doi:10.1038/s41467-022-28030-3), 2022-01-17
Supplement: 41467_2022_28030_MOESM3_ESM.pdf [file 41467_2022_28030_MOESM3_ESM.pdf]

## Reporting Summary

Nature Portfolio wishes to improve the reproducibility of the work that we publish. This form provides structure for consistency and transparency in reporting. For further information on Nature Portfolio policies, see our [Editorial Policies](#) and the [Editorial Policy Checklist](#).

### Statistics

For all statistical analyses, confirm that the following items are present in the figure legend, table legend, main text, or Methods section.

n/a Confirmed

- |                                     |                                     |                                                                                                                                                                                                                                                            |
|-------------------------------------|-------------------------------------|------------------------------------------------------------------------------------------------------------------------------------------------------------------------------------------------------------------------------------------------------------|
| <input type="checkbox"/>            | <input checked="" type="checkbox"/> | The exact sample size ( $n$ ) for each experimental group/condition, given as a discrete number and unit of measurement                                                                                                                                    |
| <input type="checkbox"/>            | <input checked="" type="checkbox"/> | A statement on whether measurements were taken from distinct samples or whether the same sample was measured repeatedly                                                                                                                                    |
| <input type="checkbox"/>            | <input checked="" type="checkbox"/> | The statistical test(s) used AND whether they are one- or two-sided<br><i>Only common tests should be described solely by name; describe more complex techniques in the Methods section.</i>                                                               |
| <input checked="" type="checkbox"/> | <input type="checkbox"/>            | A description of all covariates tested                                                                                                                                                                                                                     |
| <input type="checkbox"/>            | <input checked="" type="checkbox"/> | A description of any assumptions or corrections, such as tests of normality and adjustment for multiple comparisons                                                                                                                                        |
| <input type="checkbox"/>            | <input checked="" type="checkbox"/> | A full description of the statistical parameters including central tendency (e.g. means) or other basic estimates (e.g. regression coefficient) AND variation (e.g. standard deviation) or associated estimates of uncertainty (e.g. confidence intervals) |
| <input type="checkbox"/>            | <input checked="" type="checkbox"/> | For null hypothesis testing, the test statistic (e.g. $F$ , $t$ , $r$ ) with confidence intervals, effect sizes, degrees of freedom and $P$ value noted<br><i>Give <math>P</math> values as exact values whenever suitable.</i>                            |
| <input checked="" type="checkbox"/> | <input type="checkbox"/>            | For Bayesian analysis, information on the choice of priors and Markov chain Monte Carlo settings                                                                                                                                                           |
| <input checked="" type="checkbox"/> | <input type="checkbox"/>            | For hierarchical and complex designs, identification of the appropriate level for tests and full reporting of outcomes                                                                                                                                     |
| <input type="checkbox"/>            | <input checked="" type="checkbox"/> | Estimates of effect sizes (e.g. Cohen's $d$ , Pearson's $r$ ), indicating how they were calculated                                                                                                                                                         |

*Our web collection on [statistics for biologists](#) contains articles on many of the points above.*

### Software and code

Policy information about [availability of computer code](#)

|                 |                                                                                                                                                                                                                                                                                                                                                                                                                                                                                                                                                                                                                                                                                                                                                                        |
|-----------------|------------------------------------------------------------------------------------------------------------------------------------------------------------------------------------------------------------------------------------------------------------------------------------------------------------------------------------------------------------------------------------------------------------------------------------------------------------------------------------------------------------------------------------------------------------------------------------------------------------------------------------------------------------------------------------------------------------------------------------------------------------------------|
| Data collection | No specific codes were used to acquire the data analysed in this study.                                                                                                                                                                                                                                                                                                                                                                                                                                                                                                                                                                                                                                                                                                |
| Data analysis   | SVR-LSM analyses were performed with the Matlab code by Zhang et al. ( <a href="https://github.com/yongsheng-zhang/SVR-LSM">https://github.com/yongsheng-zhang/SVR-LSM</a> ). Optimization of SVR-LSM hyper-parameters was performed with the Matlab code by Wiesen et al. ( <a href="https://data.mendeley.com/datasets/2hyhk44zrj/2">https://data.mendeley.com/datasets/2hyhk44zrj/2</a> ). Measures of disconnection severity were performed with Lesion Quantification Toolkit (Griffis et al., 2021) ( <a href="https://wustl.box.com/v/LesionQuantificationToolkit">https://wustl.box.com/v/LesionQuantificationToolkit</a> ). The three softwares were run under Matlab (version 2020b). Violin and notch boxplots were made with R-software (Version 1.4.1103) |

For manuscripts utilizing custom algorithms or software that are central to the research but not yet described in published literature, software must be made available to editors and reviewers. We strongly encourage code deposition in a community repository (e.g. GitHub). See the Nature Portfolio [guidelines for submitting code & software](#) for further information.

### Data

Policy information about [availability of data](#)

All manuscripts must include a [data availability statement](#). This statement should provide the following information, where applicable:

- Accession codes, unique identifiers, or web links for publicly available datasets
- A description of any restrictions on data availability
- For clinical datasets or third party data, please ensure that the statement adheres to our [policy](#)

The unthresholded SVR-LSM p-maps, the raw beta maps, the raw lesion maps and the overlap maps generated in this study as well as the raw behavioral dataset are available without restriction at <https://doi.org/10.6084/m9.figshare.16822306.v3>. All raw behavior data are also provided in the Source data files. The 1065-HCP tractography atlas is available at <https://brain.labsolver.org/>.

## Field-specific reporting

Please select the one below that is the best fit for your research. If you are not sure, read the appropriate sections before making your selection.

Life sciences  Behavioural & social sciences  Ecological, evolutionary & environmental sciences

For a reference copy of the document with all sections, see [nature.com/documents/nr-reporting-summary-flat.pdf](https://www.nature.com/documents/nr-reporting-summary-flat.pdf)

## Life sciences study design

All studies must disclose on these points even when the disclosure is negative.

|                 |                                                                                                                                                                                                                                                                                                                                                                                                                                                                                                                                                                                                                                                                                                                                                                                                   |
|-----------------|---------------------------------------------------------------------------------------------------------------------------------------------------------------------------------------------------------------------------------------------------------------------------------------------------------------------------------------------------------------------------------------------------------------------------------------------------------------------------------------------------------------------------------------------------------------------------------------------------------------------------------------------------------------------------------------------------------------------------------------------------------------------------------------------------|
| Sample size     | The sample size was n = 128 patients. No sample size calculation was performed: we relied on the largest longitudinal dataset ever published to our knowledge gained from homonegous patients with a lower-grade glioma - a rare tumor of the CNS. Previous studies have shown that a sample size of 100-120 patients is enough to provide stable lesion-symptom results in the context of SVR-LSM (e.g. Wiesen et al., 2019; Ivanova et al., 2021). As healthy controls were retrospectively enrolled, the quota method (based on age, educational attainment and sex) was used to match the control group with the patient group. No sample size calculation was performed; we considered that n = 44 control participants was enough to adequately represent the inter-individual variability. |
| Data exclusions | No data were excluded                                                                                                                                                                                                                                                                                                                                                                                                                                                                                                                                                                                                                                                                                                                                                                             |
| Replication     | A 5-fold cross-validation procedure was used to estimate prediction accuracy and reproducibility of SVR-LSM models                                                                                                                                                                                                                                                                                                                                                                                                                                                                                                                                                                                                                                                                                |
| Randomization   | Not relevant here: just one experimental group included in the main analyses.                                                                                                                                                                                                                                                                                                                                                                                                                                                                                                                                                                                                                                                                                                                     |
| Blinding        | no group allocation.                                                                                                                                                                                                                                                                                                                                                                                                                                                                                                                                                                                                                                                                                                                                                                              |

## Reporting for specific materials, systems and methods

We require information from authors about some types of materials, experimental systems and methods used in many studies. Here, indicate whether each material, system or method listed is relevant to your study. If you are not sure if a list item applies to your research, read the appropriate section before selecting a response.

### Materials & experimental systems

| n/a                                 | Involved in the study                                           |
|-------------------------------------|-----------------------------------------------------------------|
| <input checked="" type="checkbox"/> | <input type="checkbox"/> Antibodies                             |
| <input checked="" type="checkbox"/> | <input type="checkbox"/> Eukaryotic cell lines                  |
| <input checked="" type="checkbox"/> | <input type="checkbox"/> Palaeontology and archaeology          |
| <input checked="" type="checkbox"/> | <input type="checkbox"/> Animals and other organisms            |
| <input type="checkbox"/>            | <input checked="" type="checkbox"/> Human research participants |
| <input checked="" type="checkbox"/> | <input type="checkbox"/> Clinical data                          |
| <input checked="" type="checkbox"/> | <input type="checkbox"/> Dual use research of concern           |

### Methods

| n/a                                 | Involved in the study                                      |
|-------------------------------------|------------------------------------------------------------|
| <input checked="" type="checkbox"/> | <input type="checkbox"/> ChIP-seq                          |
| <input checked="" type="checkbox"/> | <input type="checkbox"/> Flow cytometry                    |
| <input type="checkbox"/>            | <input checked="" type="checkbox"/> MRI-based neuroimaging |

## Human research participants

Policy information about [studies involving human research participants](#)

|                            |                                                                                                                                                                                                                                                                                                                                                                                                                                                                                                                                                                                                                                                                                  |
|----------------------------|----------------------------------------------------------------------------------------------------------------------------------------------------------------------------------------------------------------------------------------------------------------------------------------------------------------------------------------------------------------------------------------------------------------------------------------------------------------------------------------------------------------------------------------------------------------------------------------------------------------------------------------------------------------------------------|
| Population characteristics | The patient sample consisted of 128 patients (mean age: 39.7 ± 12.3, 54 females; 121 right-handed) consecutively operated on for a lower grade glioma. The control group was composed of 44 neurologically healthy participants (mean age: 38.3 ± 11.3, 20 females; all right-handed).                                                                                                                                                                                                                                                                                                                                                                                           |
| Recruitment                | All patients operated on in our institution for a lower-grade glioma infiltrating the right hemisphere between 2013 and 2020 was included. Patients fulfilling the following exclusion criteria were discarded at the outset: higher-grade glioma identified by histopathological analyses, adjuvant radiotherapy performed before or after surgery, a visual hemianopsia identified before or after surgery to avoid contaminating task performance, and a lack of longitudinal behavioral data. As healthy controls were retrospectively enrolled, the quota method (based on age, educational attainment and sex) was used to match the control group with the patient group. |
| Ethics oversight           | All participants provided informed consent.<br>Montpellier University Medical center's institutional review board for patients<br>French College of Neurosurgery for healthy participants                                                                                                                                                                                                                                                                                                                                                                                                                                                                                        |

Note that full information on the approval of the study protocol must also be provided in the manuscript.

## Magnetic resonance imaging

### Experimental design

|                                 |                                                                                                                                                                                                                                                                                                                                                                                                                                                                  |
|---------------------------------|------------------------------------------------------------------------------------------------------------------------------------------------------------------------------------------------------------------------------------------------------------------------------------------------------------------------------------------------------------------------------------------------------------------------------------------------------------------|
| Design type                     | Support vector regression-lesion-symptom mapping (SVR-LSM) and disconnection analyses                                                                                                                                                                                                                                                                                                                                                                            |
| Design specifications           | Not relevant here: no in-scanner tasks were performed by the participants.                                                                                                                                                                                                                                                                                                                                                                                       |
| Behavioral performance measures | Two tasks tapping into the process of visuo-spatial attention (i.e. the line bisection task and the bell test) at three time points (i.e. before surgery, 4 days after and three months after surgery). We used as dependent variables the preoperative performances, the behavioral difference between the preoperative and the 4-day postoperative assessment and the behavioral difference between the preoperative and the 3-month postoperative assessment. |

### Acquisition

|                               |                                                                                                                                                                                                                                                                                                                                                                                                                                                                                                                                                                  |
|-------------------------------|------------------------------------------------------------------------------------------------------------------------------------------------------------------------------------------------------------------------------------------------------------------------------------------------------------------------------------------------------------------------------------------------------------------------------------------------------------------------------------------------------------------------------------------------------------------|
| Imaging type(s)               | 3D lesion maps drawn from normalized structural MRIs                                                                                                                                                                                                                                                                                                                                                                                                                                                                                                             |
| Field strength                | 1.5T or 3T                                                                                                                                                                                                                                                                                                                                                                                                                                                                                                                                                       |
| Sequence & imaging parameters | The imaging parameters were as follows: (i) preoperative FLAIR images (1.5T/3T): repetition time, 13200/800 ms; echo time, 109/108 ms; inversion time, 2500/23700 ms; field of view 210 × 240/202 × 240 mm, voxel size 0.898 × 0.898 × 6 mm <sup>3</sup> , slice thickness 5/3 mm, spacing 5.5/3.6 mm, and flip angle 150°; (ii) 3-month 3DT1 images (1.5T/3T): repetition time, 1880/1700 ms; echo time, 3.4/2.5 ms; inversion time, 1100/922 ms; field of view, 256 × 256 mm; voxel size, 1 × 1 × 1 mm <sup>3</sup> , 176 axial slices, and flip angle 15°/9°. |
| Area of acquisition           | Brain areas lesionned in at least three patients                                                                                                                                                                                                                                                                                                                                                                                                                                                                                                                 |
| Diffusion MRI                 | <input type="checkbox"/> Used <input checked="" type="checkbox"/> Not used                                                                                                                                                                                                                                                                                                                                                                                                                                                                                       |

### Preprocessing

|                            |                                                                                                                                                                         |
|----------------------------|-------------------------------------------------------------------------------------------------------------------------------------------------------------------------|
| Preprocessing software     | SPM12 (last version), Clinical Toolbox (last version)                                                                                                                   |
| Normalization              | Enantiomorphic normalization using SPM12' Clinical Toolbox (last version)                                                                                               |
| Normalization template     | MNI152                                                                                                                                                                  |
| Noise and artifact removal | To minimize the potential bias caused by abnormal lesion-related radiological signals, MRI datasets were registered to the MNI space using enantiomorphic normalization |
| Volume censoring           | Not relevant here: we did not process fMRI data.                                                                                                                        |

### Statistical modeling & inference

|                                                                           |                                                                                                                                                                                            |
|---------------------------------------------------------------------------|--------------------------------------------------------------------------------------------------------------------------------------------------------------------------------------------|
| Model type and settings                                                   | Multivariate for lesion-symptom analyses and univariate for disconnection analyses                                                                                                         |
| Effect(s) tested                                                          | We assessed the relationship between lesion locations and behavior outcomes (SVR-LSM) and the relationship between disconnection severity and behavioral outcomes (disconnection analyses) |
| Specify type of analysis:                                                 | <input checked="" type="checkbox"/> Whole brain <input type="checkbox"/> ROI-based <input type="checkbox"/> Both                                                                           |
| Statistic type for inference<br>(See <a href="#">Eklund et al. 2016</a> ) | Permutation procedure (5000) to derive p-maps from raw beta maps                                                                                                                           |
| Correction                                                                | FDR at q = 0.05                                                                                                                                                                            |

### Models & analysis

|                                               |                                                                                                                   |
|-----------------------------------------------|-------------------------------------------------------------------------------------------------------------------|
| n/a                                           | Involved in the study                                                                                             |
| <input checked="" type="checkbox"/>           | <input type="checkbox"/> Functional and/or effective connectivity                                                 |
| <input checked="" type="checkbox"/>           | <input type="checkbox"/> Graph analysis                                                                           |
| <input type="checkbox"/>                      | <input checked="" type="checkbox"/> Multivariate modeling or predictive analysis                                  |
| Multivariate modeling and predictive analysis | We used support vector regression to model the relationships between damaged voxels and behavioral data outcomes. |
